# Supplementary material for: Facile synthesis and observation of discontinuous red-shift photoluminescence of CdTe/CdS core/shell nanocrystals
Source: Royal Society of Chemistry journal article supplement (doi:10.1039/c1ce05757j), 2011-10-26
Supplement: c1ce05757j.pdf [file c1ce05757j.pdf]

# Synthesis and Observation of Discontinuous Red-shift Photoluminescence of CdTe/CdS Core/Shell Nanocrystals

*Weiwei Xu<sup>a,c</sup>, Huaibin Shen<sup>a</sup>, Jin zhong Niu<sup>a</sup>, Changhua Zhou<sup>a</sup>, Cailan Yu<sup>b</sup>, Xiaomin Li<sup>a</sup>,*

*Yuan Hang<sup>c</sup>, Hongzhe Wang<sup>a</sup>, Lan Ma<sup>c\*</sup>, and Lin Song Li<sup>a\*</sup>*

<sup>a</sup>Key Laboratory for Special Functional Materials of Ministry of Education, Henan  
University, Kaifeng 475004, P. R. China

<sup>b</sup>Key Laboratory of Photochemistry, Institute of Chemistry, Chinese Academy of  
Sciences, Beijing, 100080, P. R. China

<sup>c</sup>Life Science Division, Graduate School at Shenzhen, Tsinghua University, Shenzhen,  
518055, PR China

---

\* To whom correspondence should be addressed. Fax: +86-378-3881358; Tel: +86-378-3881358; E-mail:  
lsli@henu.edu.cn.; malan@sz.tsinghua.edu.cn.

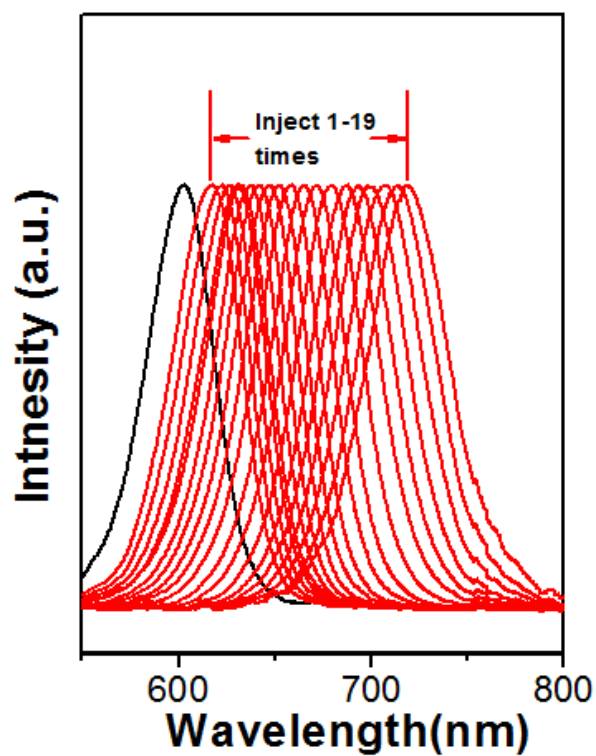

**Figure S1.** PL spectra upon consecutive growth of CdTe/CdSe NCs.

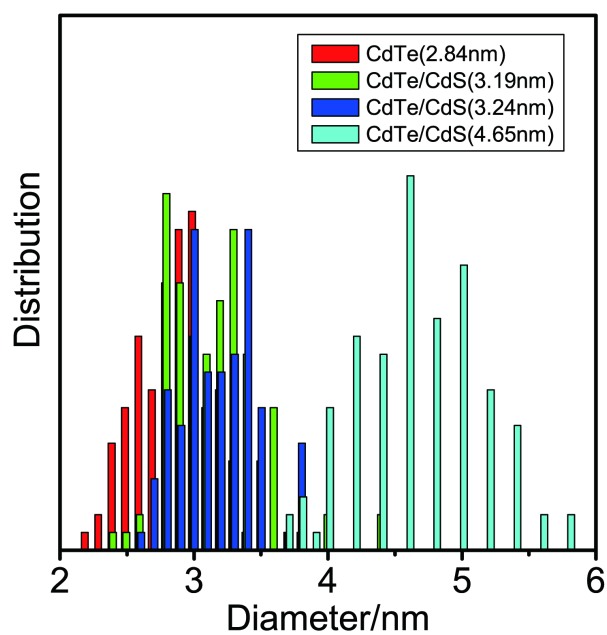

**Figure S2.** Size histograms of CdTe and CdTe/CdS NCs corresponding to Figure 2.

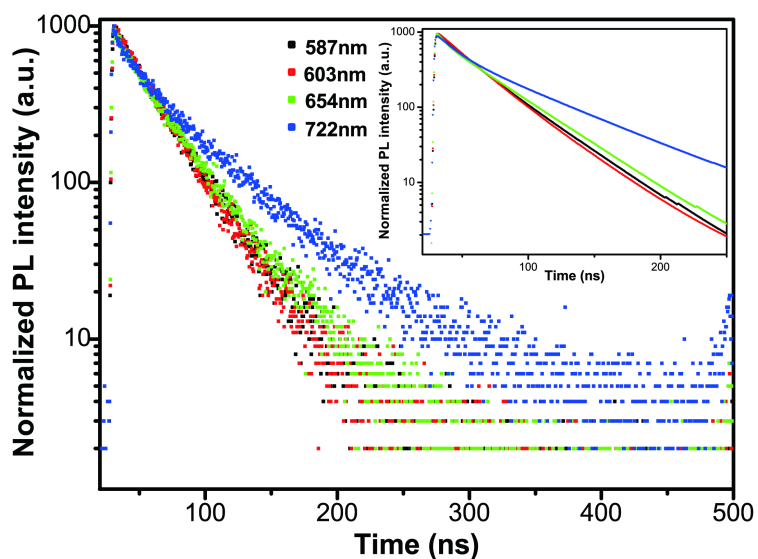

**Figure S3.** PL decays of CdTe and CdTe/CdS NCs detected at 587 nm, 603 nm, 654 nm, and 722 nm, respectively.

**Table S1.** Time constants  $T_1$  and  $T_2$ , components  $A_1$  (corresponding to  $T_1$ ) and  $A_2$  (corresponding to  $T_2$ ), and average lifetimes  $T$  of the PL emission at different wavelengths for CdTe/CdS NCs.

| <b>Sample</b>   | <b>PL/nm</b> | <b>Precursor<br/>(mL)</b> | <b><math>T_1</math>/ns</b> | <b><math>A_1</math>(%)</b> | <b><math>T_2</math>/ns</b> | <b><math>A_2</math>(%)</b> | <b><math>T</math>/ns</b> |
|-----------------|--------------|---------------------------|----------------------------|----------------------------|----------------------------|----------------------------|--------------------------|
| <b>CdTe</b>     | 587          | 0                         | 16.65                      | 19.56                      | 36.38                      | 80.44                      | 32.52                    |
| <b>CdTe/CdS</b> | 603          | 0.6                       | 23.34                      | 47.81                      | 38.36                      | 52.19                      | 21.19                    |
| <b>CdTe/CdS</b> | 654          | 0.8                       | 5.96                       | 5.92                       | 37.33                      | 94.08                      | 35.47                    |
| <b>CdTe/CdS</b> | 722          | 1.4                       | 14.13                      | 15.68                      | 59.25                      | 84.32                      | 55.17                    |

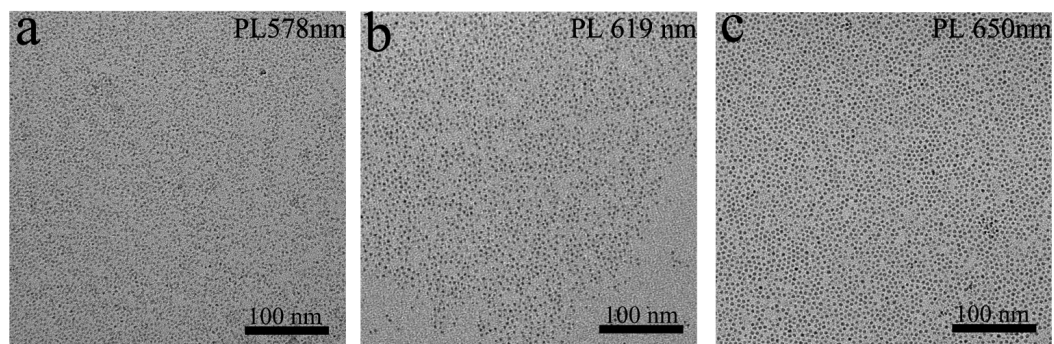

**Figure S4.** TEM images of CdTe core with (a) 2.54 nm, (b) 3.27 nm, and (c) 3.69 nm.
